# Supplementary material for: Application of Co/Ti film catalysts with different nanostructures in the reduction of p-nitrophenol to p-aminophenol
Source: Royal Society of Chemistry journal article supplement (doi:10.1039/c3cy00759f), 2013-11-19
Supplement: c3cy00759f.pdf [file c3cy00759f.pdf]

## Electronic Supplementary Information (ESI)

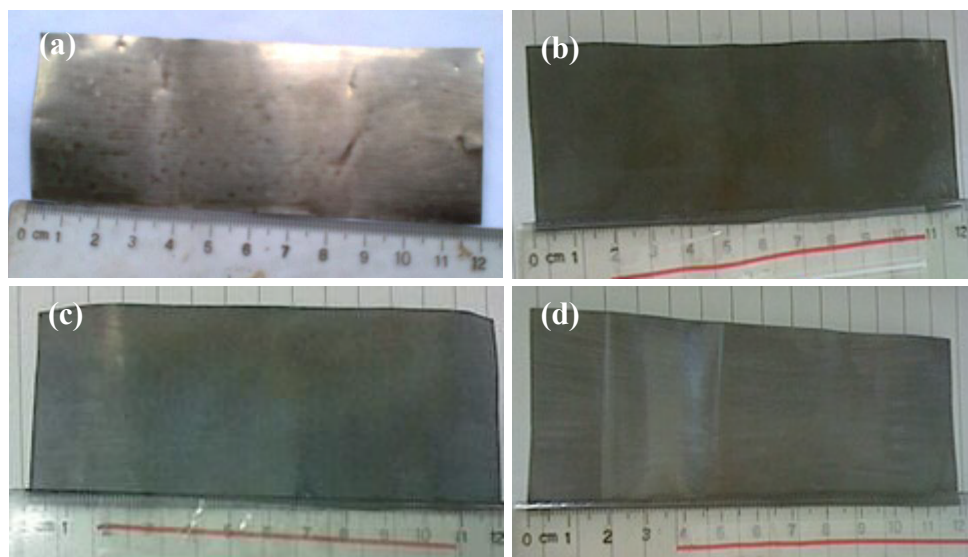

Fig. S1 Digital camera photos of Ti substrate before (a) and after deposition of different Co layer: Co/Ti 1# (b), Co/Ti 2#(c), Co/Ti 3#(d).

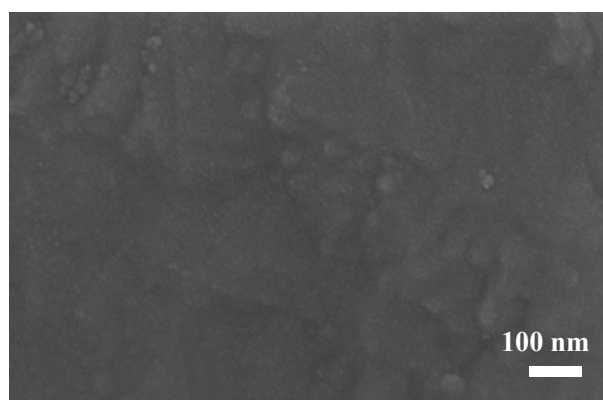

Fig. S2. SEM image of Ti sheet before the deposition of Co layer.

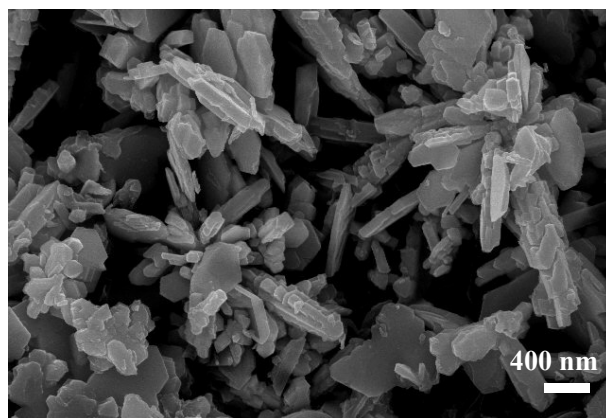

Fig. 3 SEM image of the products prepared in the absence of any complexant.

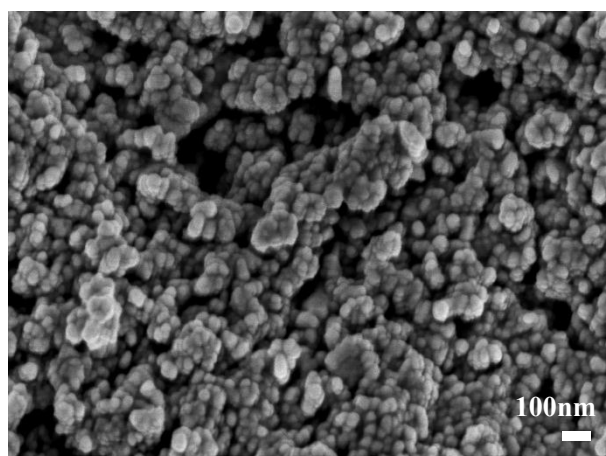

Fig. S4 SEM image of the as-prepared Co nanoparticles.
